# Supplementary material for: NUDIX hydrolases with inorganic polyphosphate exo- and endopolyphosphatase activities in the glycosome, cytosol and nucleus of Trypanosoma brucei
Source: PubMed Central journal article supplement (PMC6522730; doi:10.1042/bsr20190894), 2019-05-17
Supplement: bsr20190894_Supp1.pdf [file bsr20190894_Supp1.pdf]

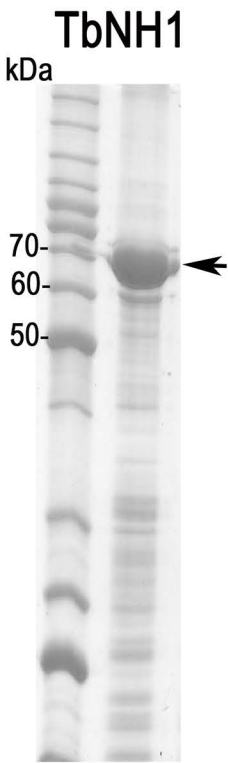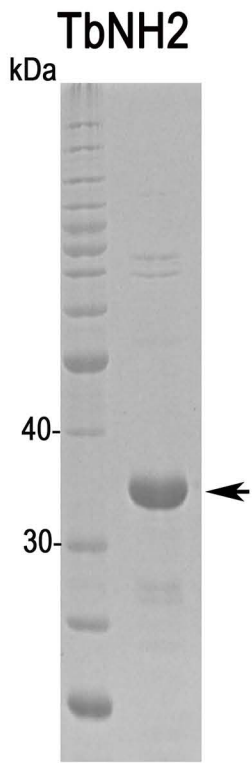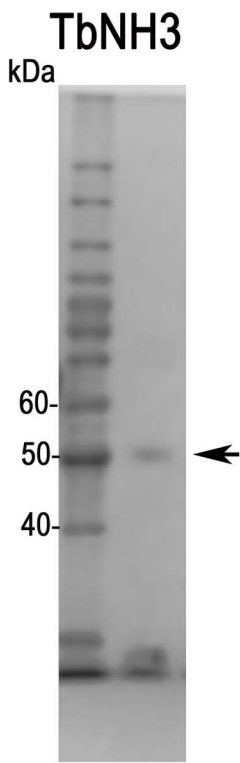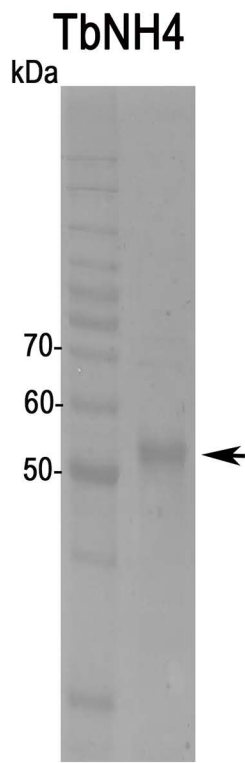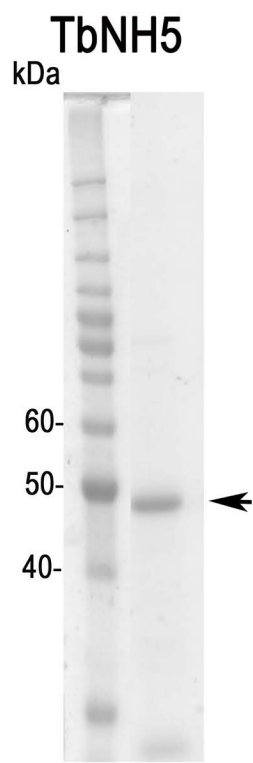

**Table S1.** Primers used in this study.

| <b>Primer</b>                                                                                                               | <b>Use</b>                                            |
|-----------------------------------------------------------------------------------------------------------------------------|-------------------------------------------------------|
| GACGACGACAAGATGCGCAAGCAATTATTTTC                                                                                            | (fwd); cloning of TbNH1 in pET32                      |
| GAGGAGAAGCCCGGTTACGATGCATCTTCCC                                                                                             | (rev); cloning of TbNH1 in pET32                      |
| GACGACGACAAGATGTACCGAAAAAATGTATGTGTGGTA                                                                                     | (fwd); cloning of TbNH2 in pET32                      |
| GAGGAGAAGCCCGGTTTATATGGAAGACCTTGTTTTCAAAA<br>ATGC                                                                           | (rev); cloning of TbNH2 in pET32                      |
| GACGACGACAAGATGAGGGACCGCTATATCAG                                                                                            | (fwd); cloning of TbNH3 in pET32                      |
| GAGGAGAAGCCCGGTTTCAGAGAGTTGCTATTTTCAGAC                                                                                     | (rev); cloning of TbNH3 in pET32                      |
| GACGACGACAAGATGCCAAACGAAACCGCGG                                                                                             | (fwd); cloning of TbNH4 in pET32                      |
| GAGGAGAAGCCCGGTTCACTCGCAGGAGGTGGG                                                                                           | (rev); cloning of TbNH4 in pET32                      |
| GACGACGACAAGATGGCTATGGGAAGAGTTT                                                                                             | (fwd); cloning of TbNH5 in pET32                      |
| GAGGAGAAGCCCGGTCTAACGCTTTCCAAGTGGG                                                                                          | (rev); cloning of TbNH5 in pET32                      |
| AATCAATTGTTACATGAGGAGGGAGGTTCCCTCAGATGA<br>ATTTACTTGGAACCCACCTCCTGCGAGCGAGACGGGTGG<br>GGTTTTTCGGGTACCGGGCCCCCCTCGAG         | (fwd); C-terminal tagging of TbNH4; template pMOTag4H |
| CGAGGAGCCAAATGCAAAGAGGATATTAACATTATTTTT<br>ATGCGATGTTACAATGCCACTGTGAGAGCTATACGAGGTGT<br>CGTTTTTCTTGGCGGCCGCTCTAGAACTAGTGGAT | (rev); C-terminal tagging of TbNH4; template pMOTag4H |
| TAAAATTCACAAGCTTATGTACCGAAAAAATGTATGTGTGG<br>TAATA                                                                          | (fwd); cloning of TbNH2 in pLEW100v5b1d-BSD           |
| TAAATGGGCAGGATCCTTATATGGAAGACCTTGTTTTCAAA<br>A                                                                              | (rev); cloning of TbNH2 in pLEW100v5b1d-BSD           |
